# Supplementary material for: Flexible synthesis of cationic peptide–porphyrin derivatives for light-triggered drug delivery and photodynamic therapy
Source: Royal Society of Chemistry journal article supplement (doi:10.1039/c6ob02135b), 2016-01-01
Supplement: c6ob02135b1.pdf [file c6ob02135b1.pdf]

Electronic Supplementary Material (ESI) for Organic & Biomolecular Chemistry.  
This journal is © The Royal Society of Chemistry 2016

## Flexible synthesis of cationic peptide-porphyrin derivatives for light-triggered drug delivery and photodynamic therapy

R. Dondi,<sup>a</sup> E. Yaghini,<sup>b</sup> K. Tewari,<sup>a</sup> L. Wang,<sup>a,c</sup> F. Giuntini,<sup>a</sup> M. Loizidou,<sup>b</sup> A.J. MacRobert,<sup>b</sup> and I. M. Eggleston<sup>a\*</sup>

<sup>a</sup>Department of Pharmacy and Pharmacology, University of Bath, Bath BA2 7AY, UK. E-mail: ie203@bath.ac.uk

<sup>b</sup>UCL Division of Surgery and Interventional Science, University College London, Royal Free Campus, Rowland Hill Street, London NW3 2PF, UK.

<sup>c</sup>School of Pharmaceutical Sciences, Shandong University, Jinan, Shandong 250012, China

### Contents

S2: Figure 1: <sup>1</sup>H NMR, <sup>13</sup>C NMR spectra, UV-visible spectrum of **(4)**

S3: Figure 2: <sup>1</sup>H NMR, <sup>13</sup>C NMR spectra, UV-visible spectrum of **(Zn-5)**

S4: Figure 3 <sup>1</sup>H NMR, <sup>13</sup>C NMR spectra, UV-visible spectrum of **(Zn-6)**

S5: Figure 4: <sup>1</sup>H NMR, <sup>13</sup>C NMR spectra, UV-visible spectrum of **(Zn-7)**

S6: Figure 5: <sup>1</sup>H NMR, <sup>13</sup>C NMR spectra, UV-visible spectrum of **(8)**

S7: Figure 6: <sup>1</sup>H NMR, <sup>13</sup>C NMR spectra, UV-visible spectrum of **(9)**

S8: Figure 7: HPLC profile, UV-visible spectrum of **(19)**

S8: Figure 8: HPLC profile, UV-visible spectrum of **(20)**

S9: Figure 9: HPLC profile, UV-visible spectrum of **(21)**

S9: Figure 10: HPLC profile, UV-visible spectrum of **(22)**

S10: Figure 11: HPLC profile, UV-visible spectrum of **(23)**

S11: Figure 12: HPLC profile, UV-visible spectrum of **(24)**

S11: Figure 13: HPLC profile, UV-visible spectrum of **(25)**

S12: Figure 14: HPLC profile, UV-visible spectrum of **(26)**

S12: Figure 15: HPLC profile, UV-visible spectrum of **(27)**

S13: Figure 16: HPLC profile, UV-visible spectrum of **(28)**

S13: Figure 17: HPLC profile, UV-visible spectrum of **(29)**

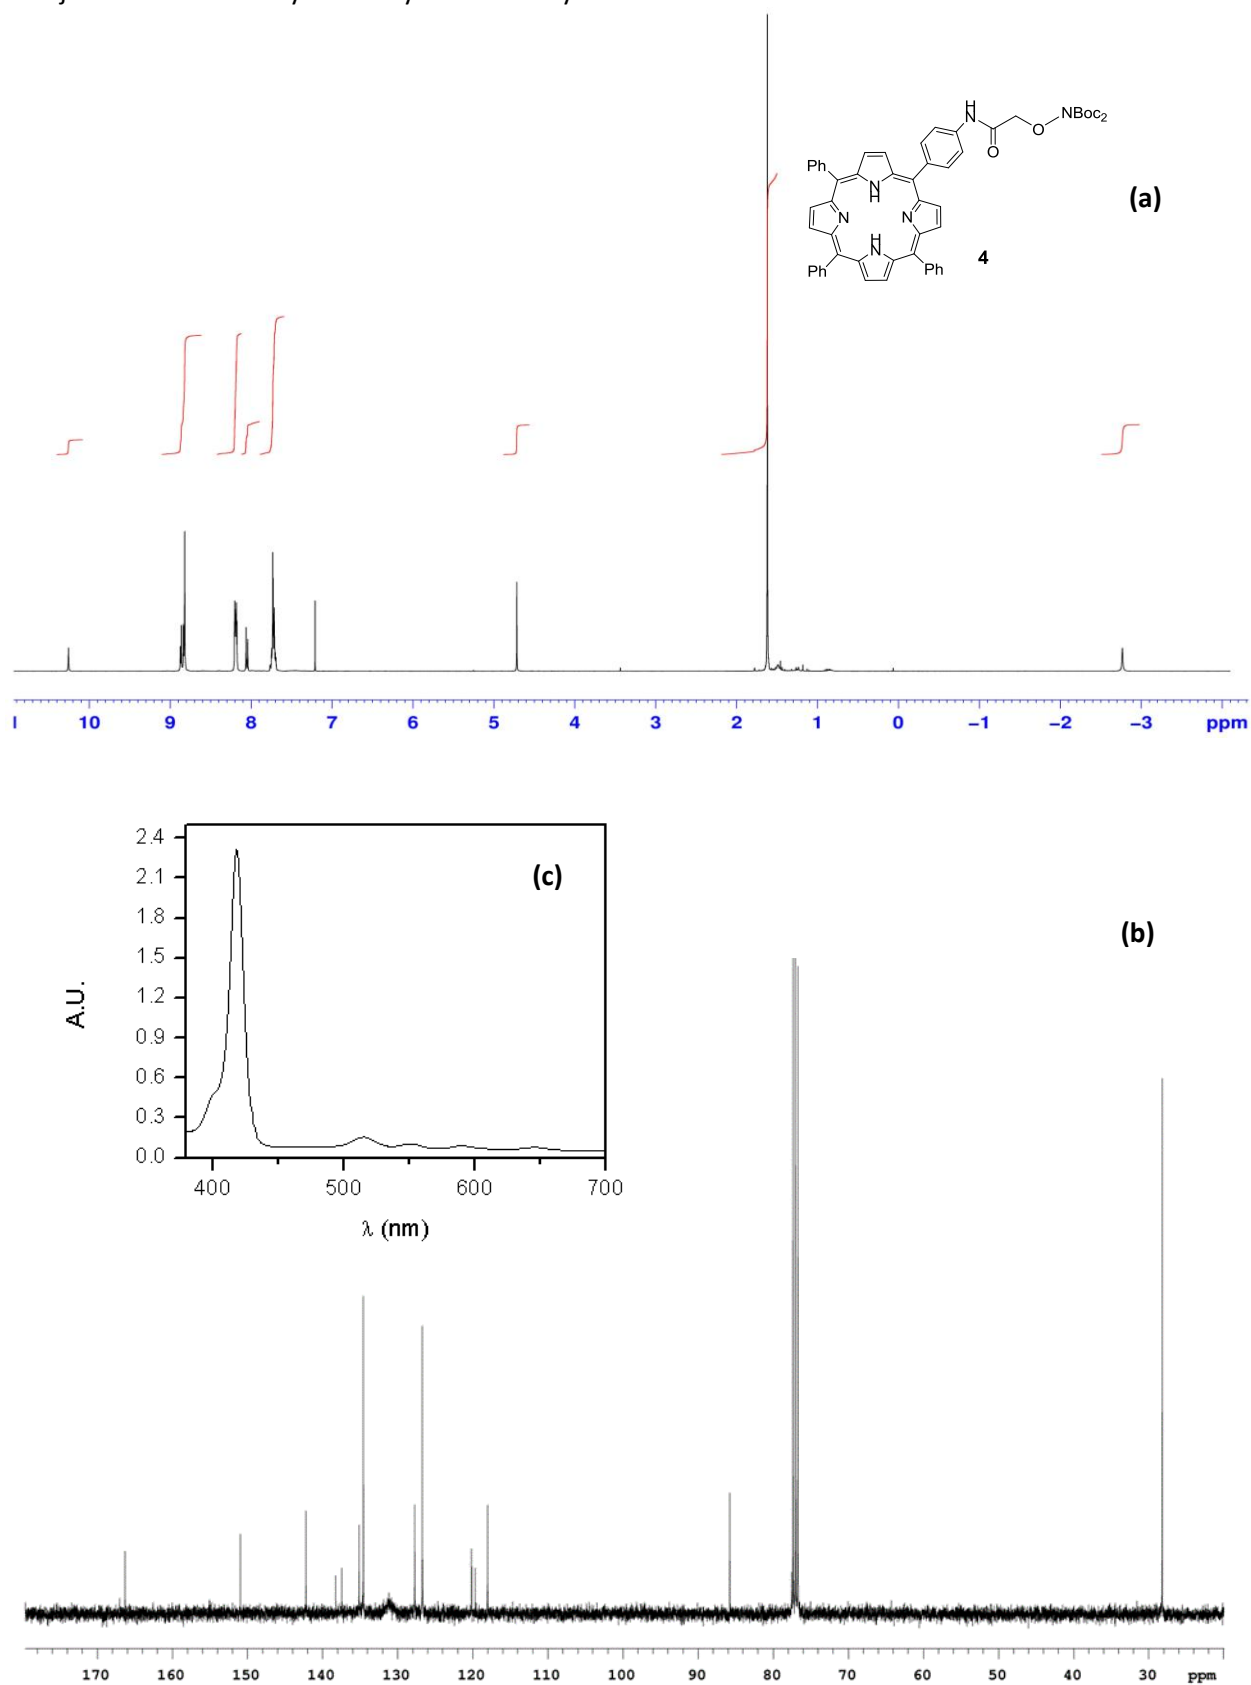

Figure 1 (a)-(b). <sup>1</sup>H NMR and <sup>13</sup>C NMR spectra in CDCl<sub>3</sub> of **4**; (c) UV-visible spectrum in CHCl<sub>3</sub> of **4**.

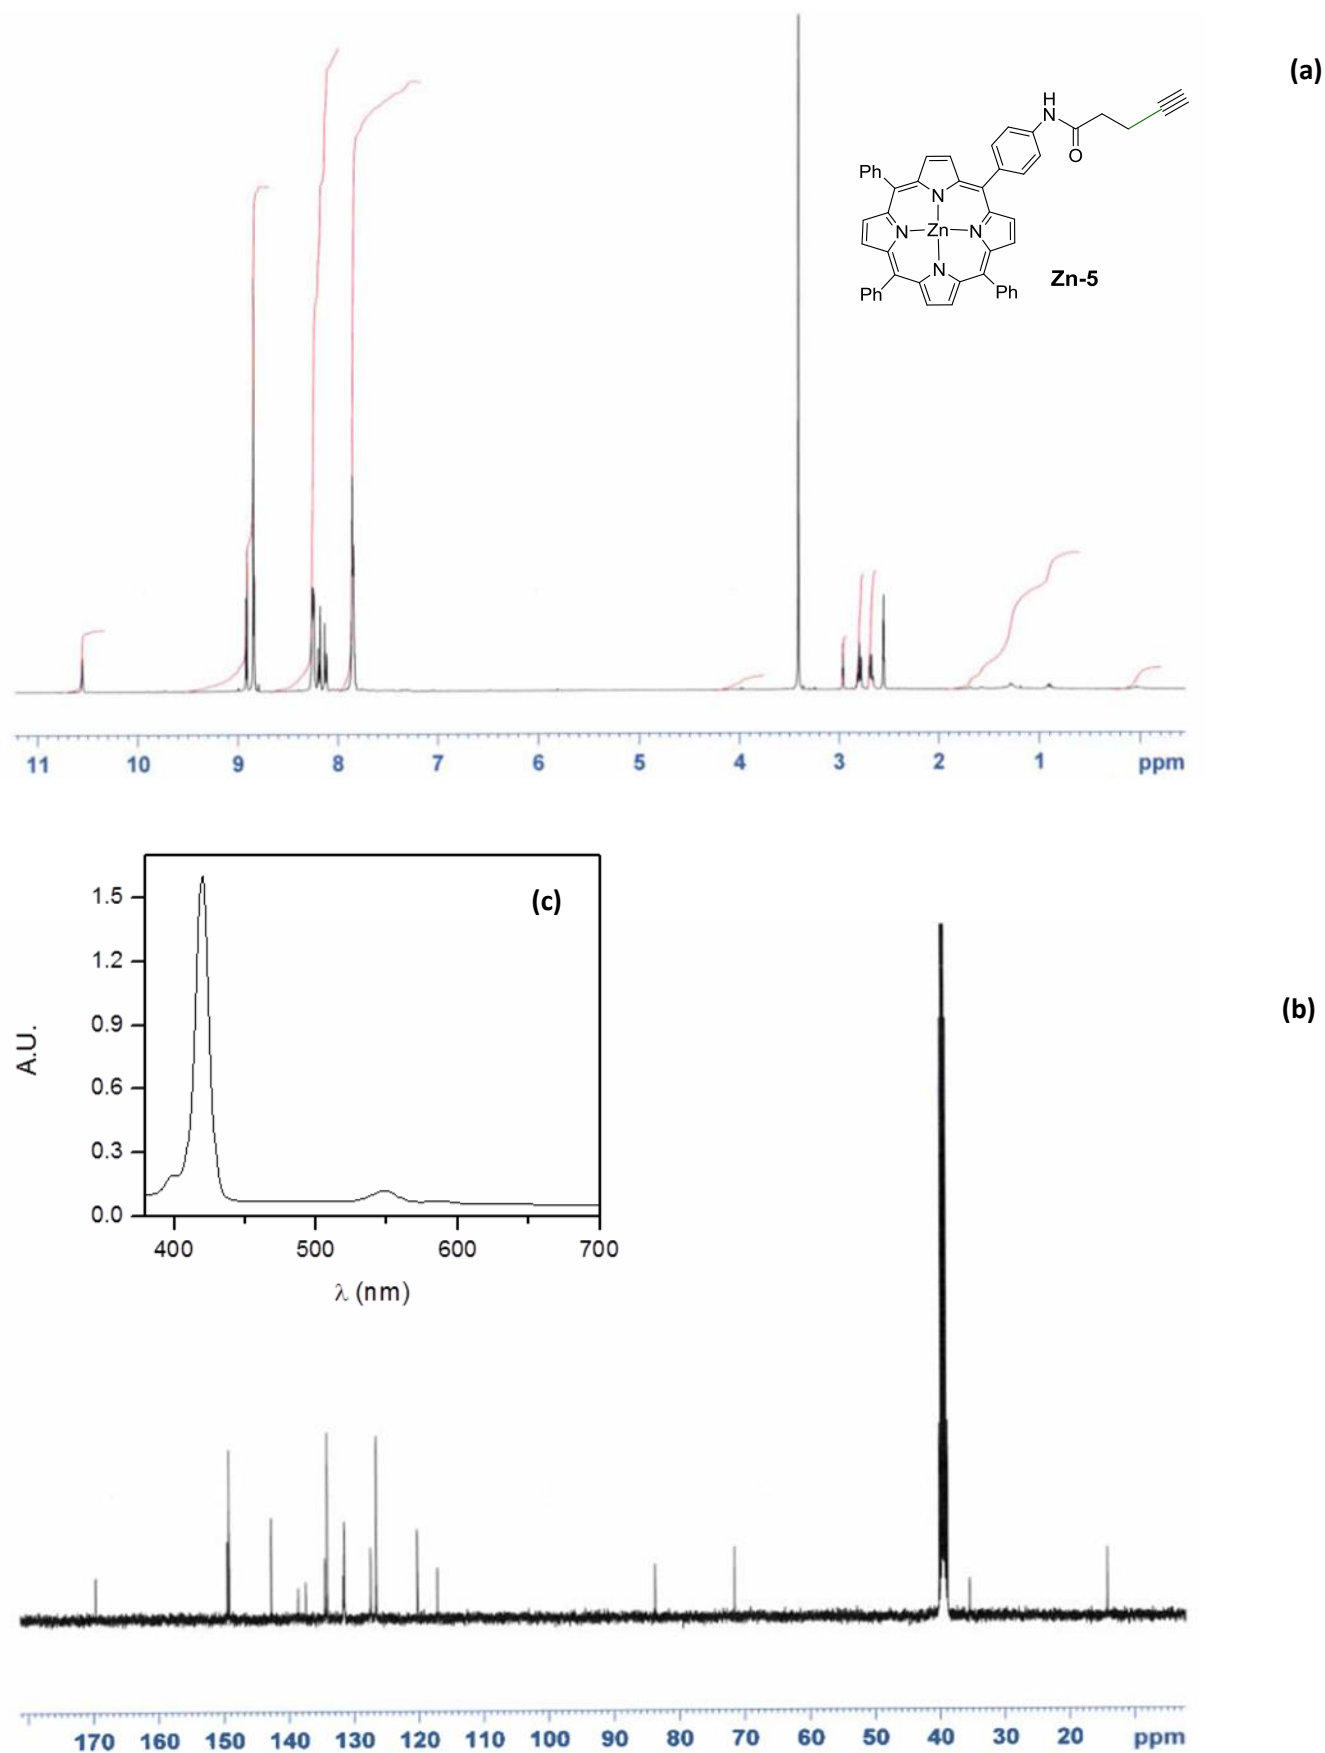

**Figure 2 (a)-(b).** <sup>1</sup>H NMR and <sup>13</sup>C NMR spectra in (CD<sub>3</sub>)<sub>2</sub>SO of Zn-5; **(c)** UV-visible spectrum in CHCl<sub>3</sub> of Zn-5.

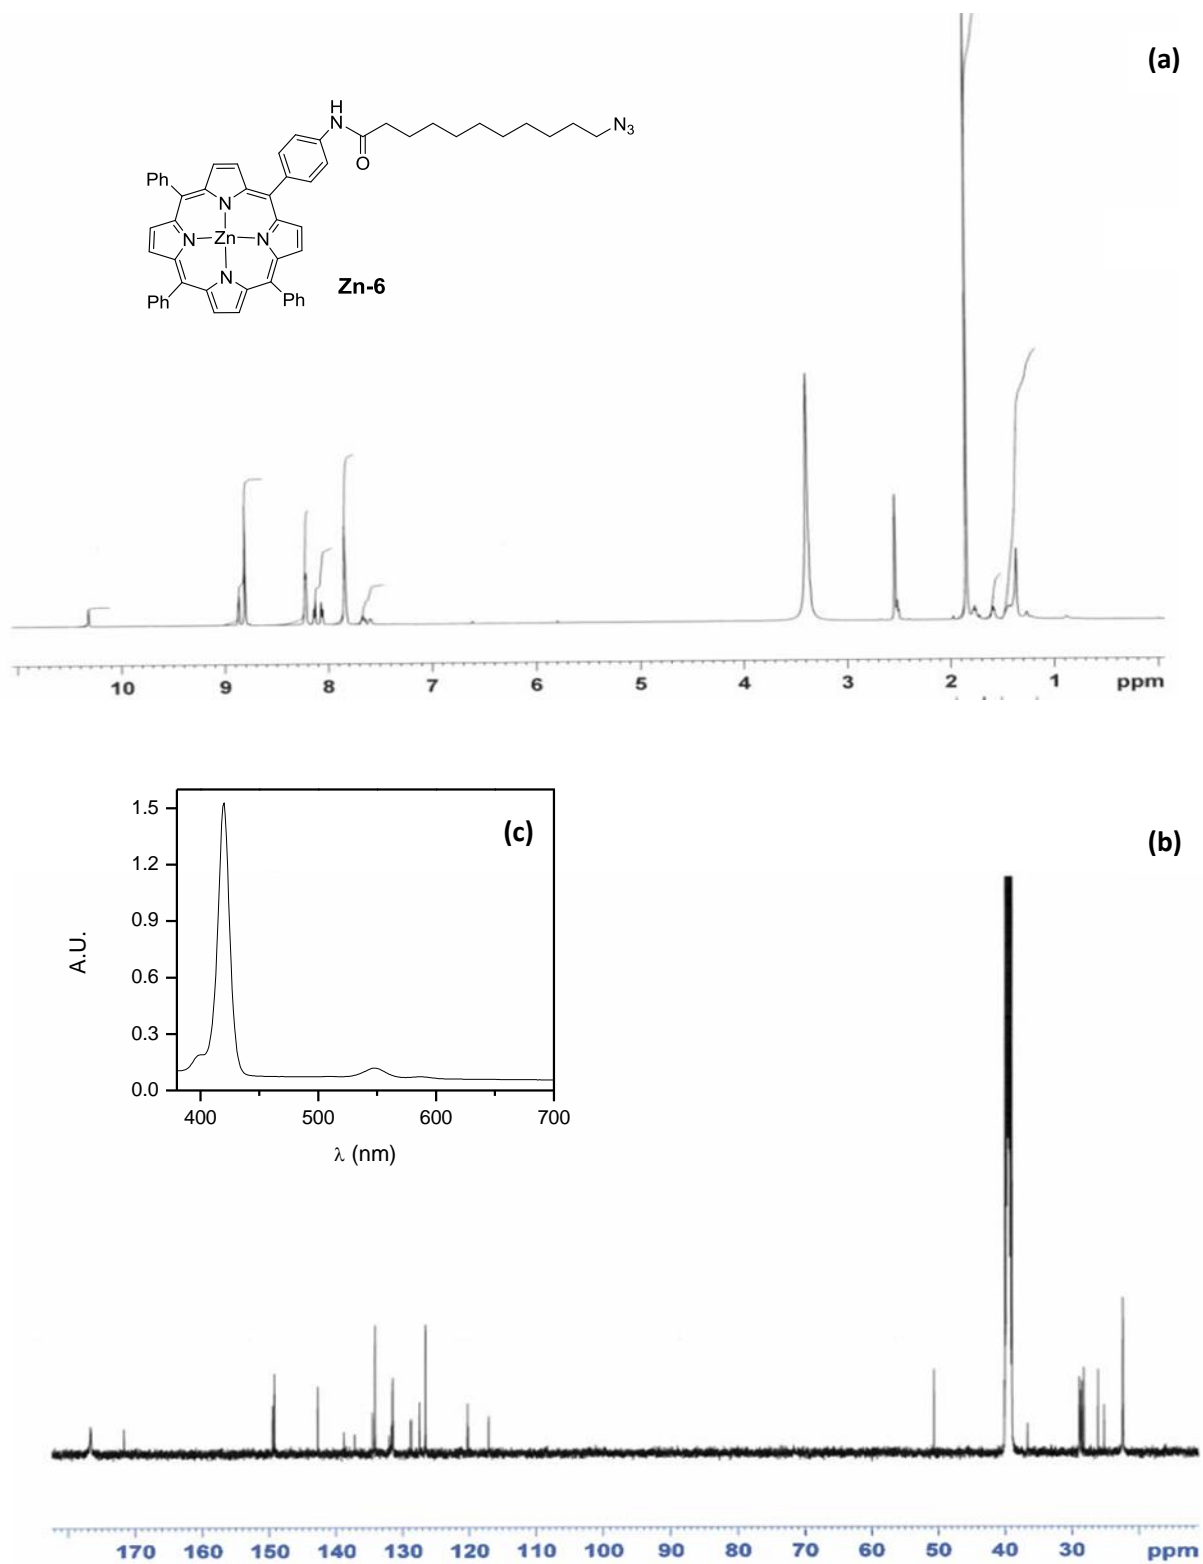

Figure 3 (a)-(b).  $^1\text{H}$  NMR and  $^{13}\text{C}$  NMR spectra in  $(\text{CD}_3)_2\text{SO}$  of Zn-6; (c) UV-visible spectrum in  $\text{CHCl}_3$  of Zn-6.

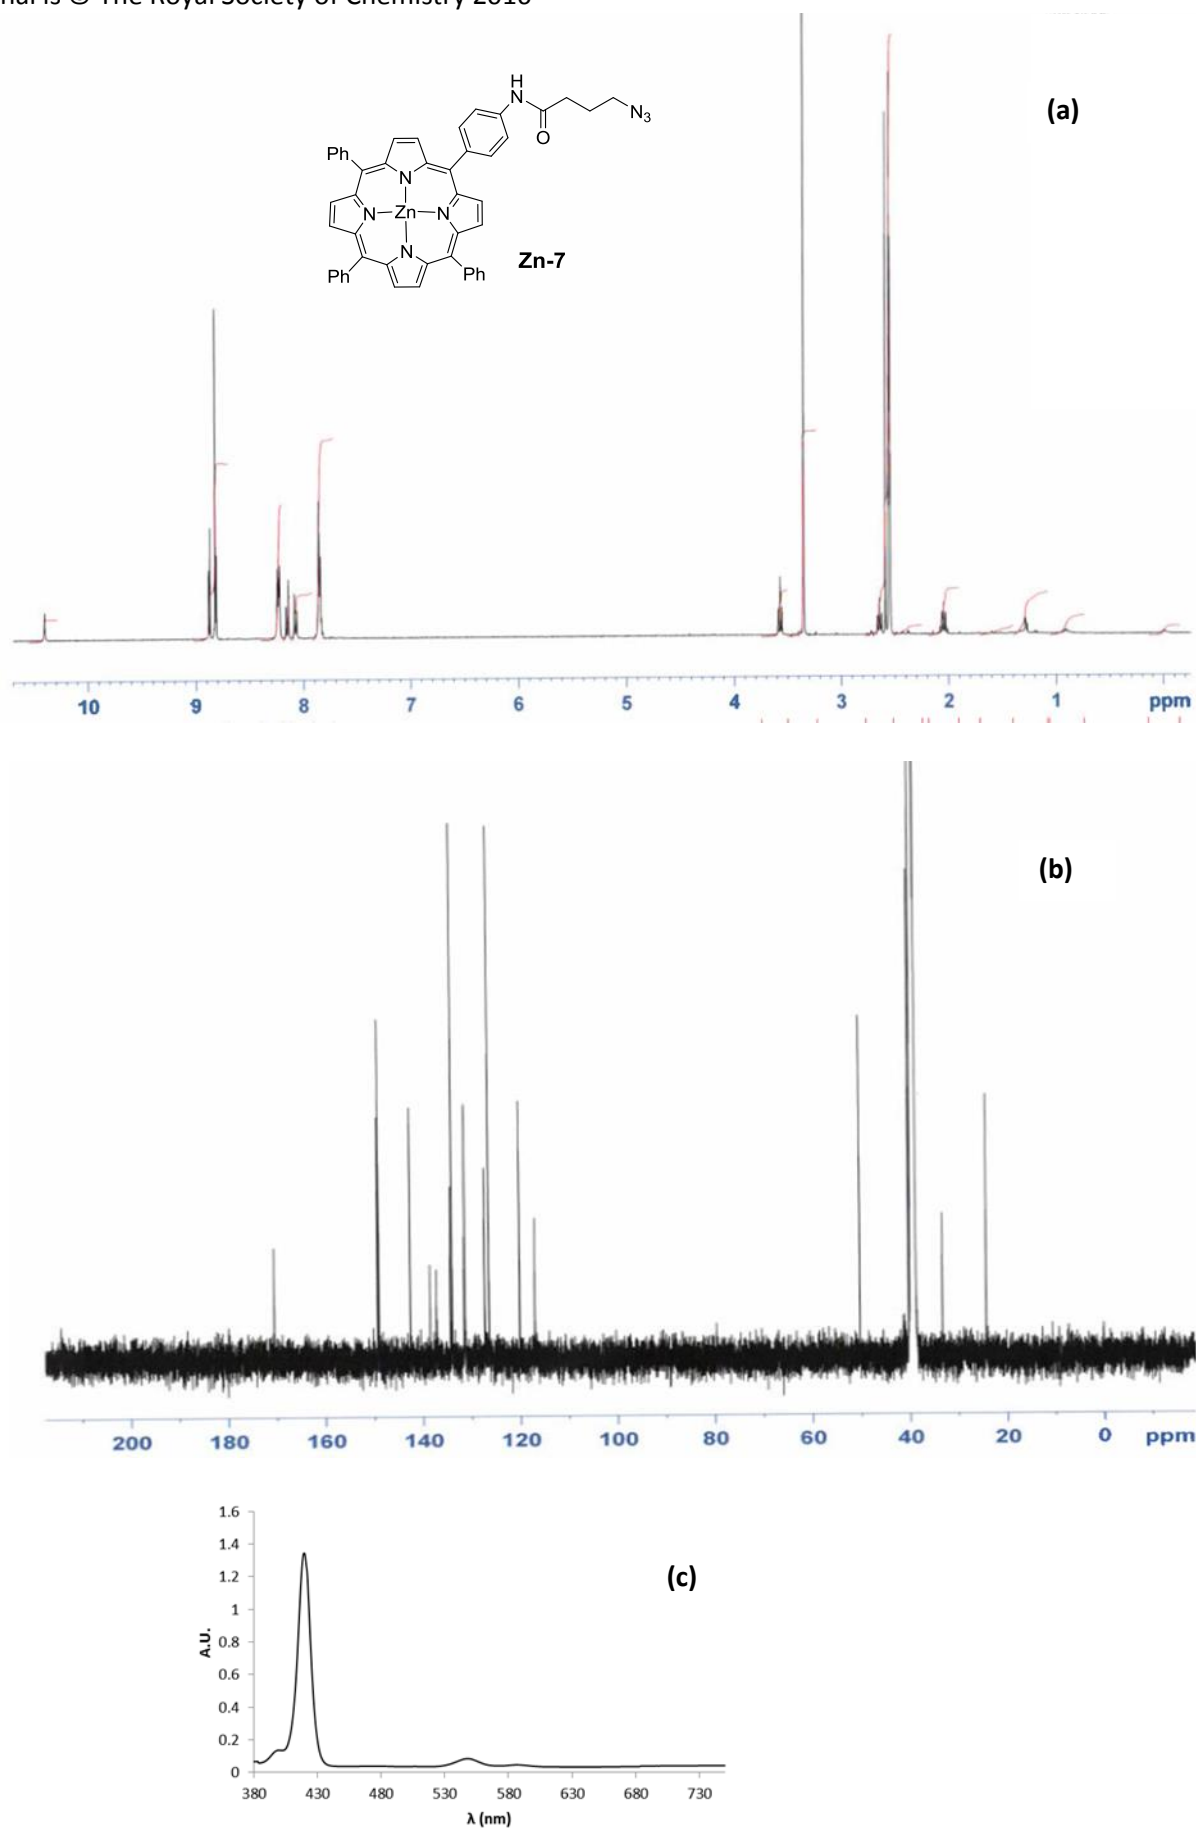

**Figure 4 (a)-(b).** <sup>1</sup>H NMR and <sup>13</sup>C NMR spectra in (CD<sub>3</sub>)<sub>2</sub>SO of Zn-7 (c) UV-visible spectrum in CHCl<sub>3</sub> of Zn-7.

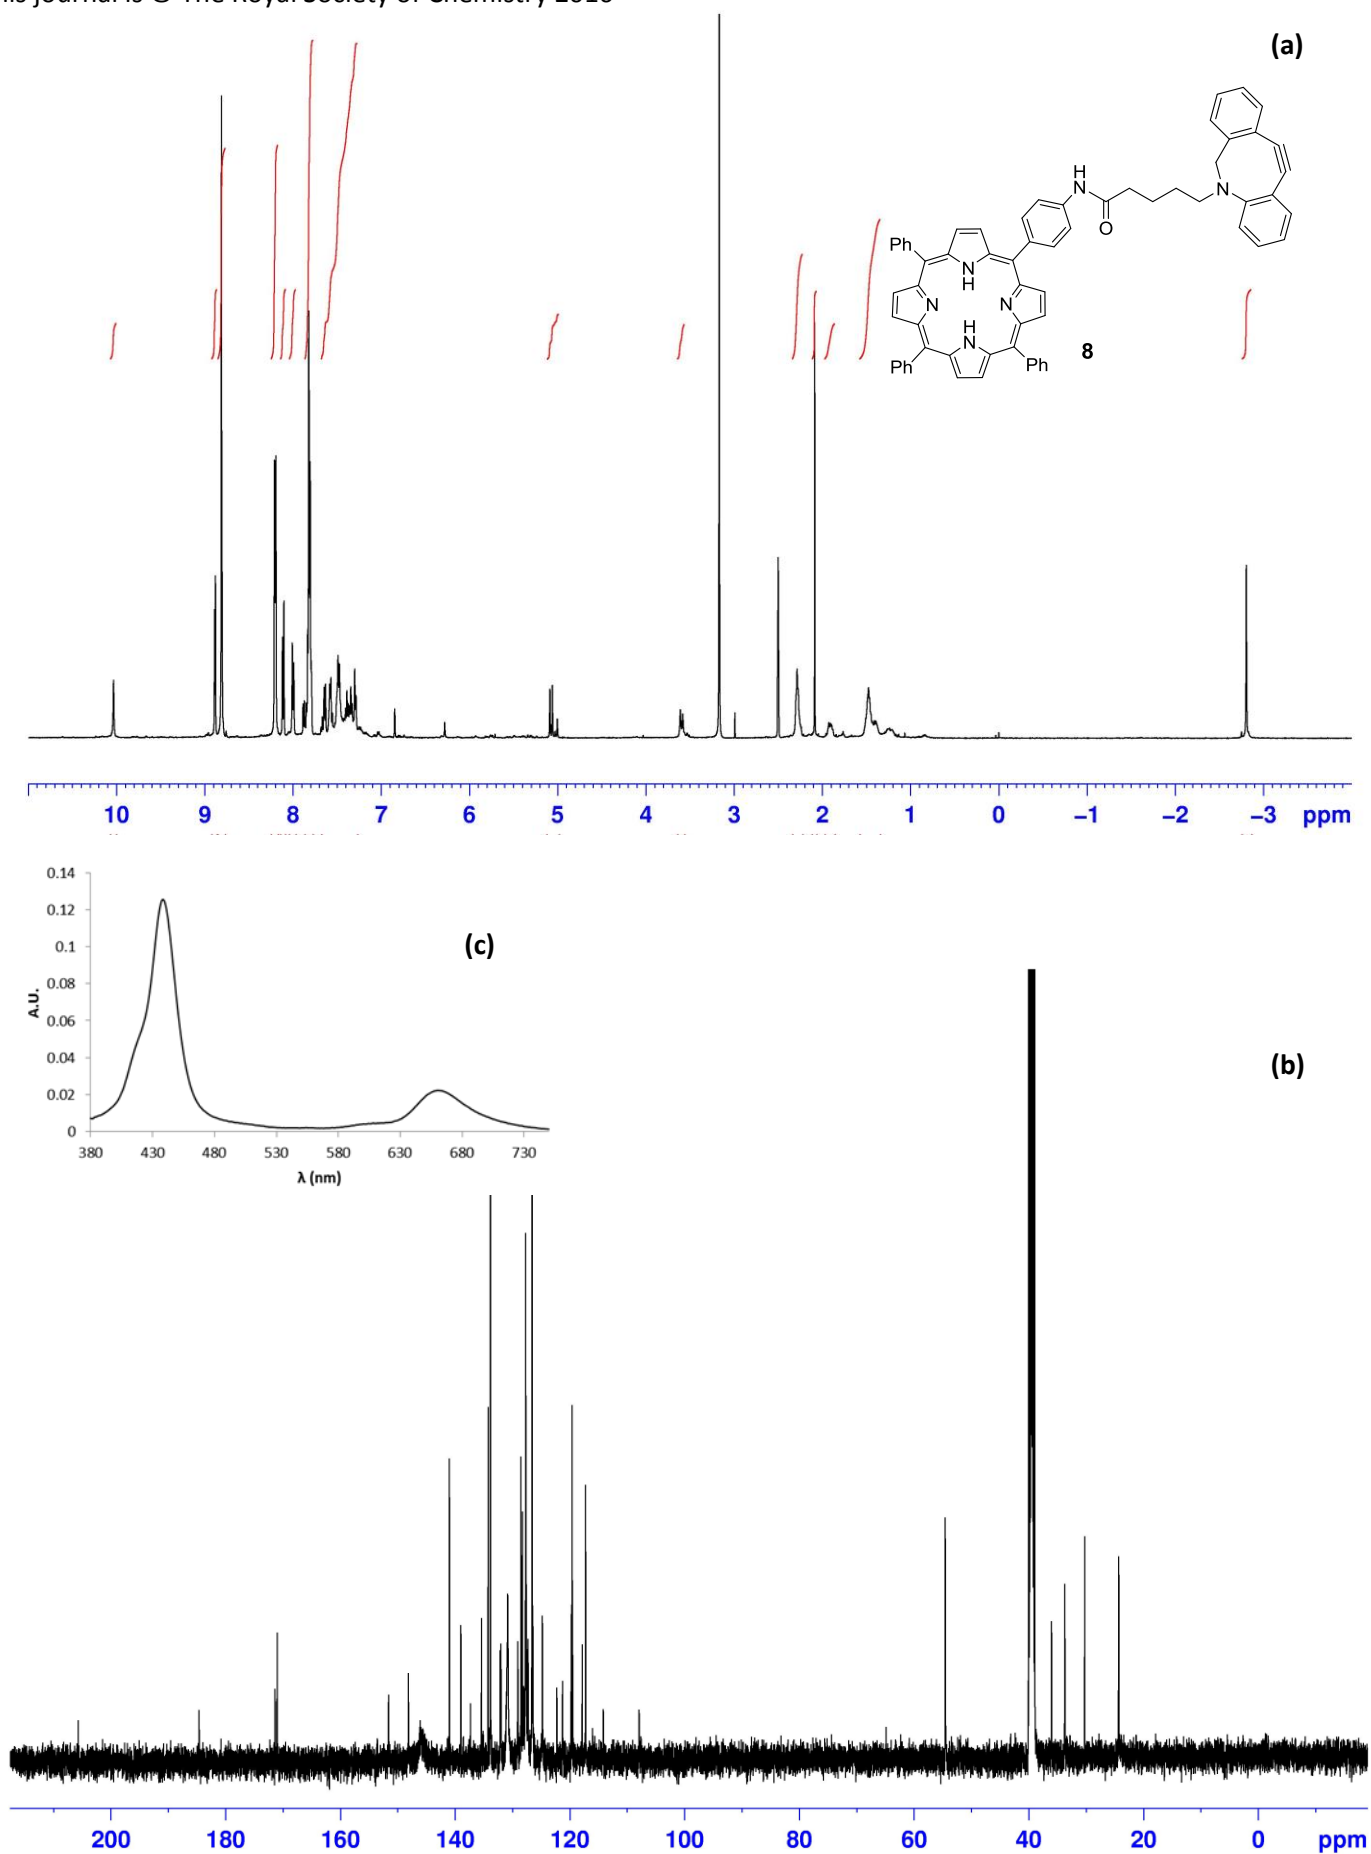

Figure 5 (a)-(b).  $^1\text{H}$  NMR and  $^{13}\text{C}$  NMR spectra in  $(\text{CD}_3)_2\text{SO}$  of **8** (c) UV-visible spectrum in  $\text{CHCl}_3$  of **8**.

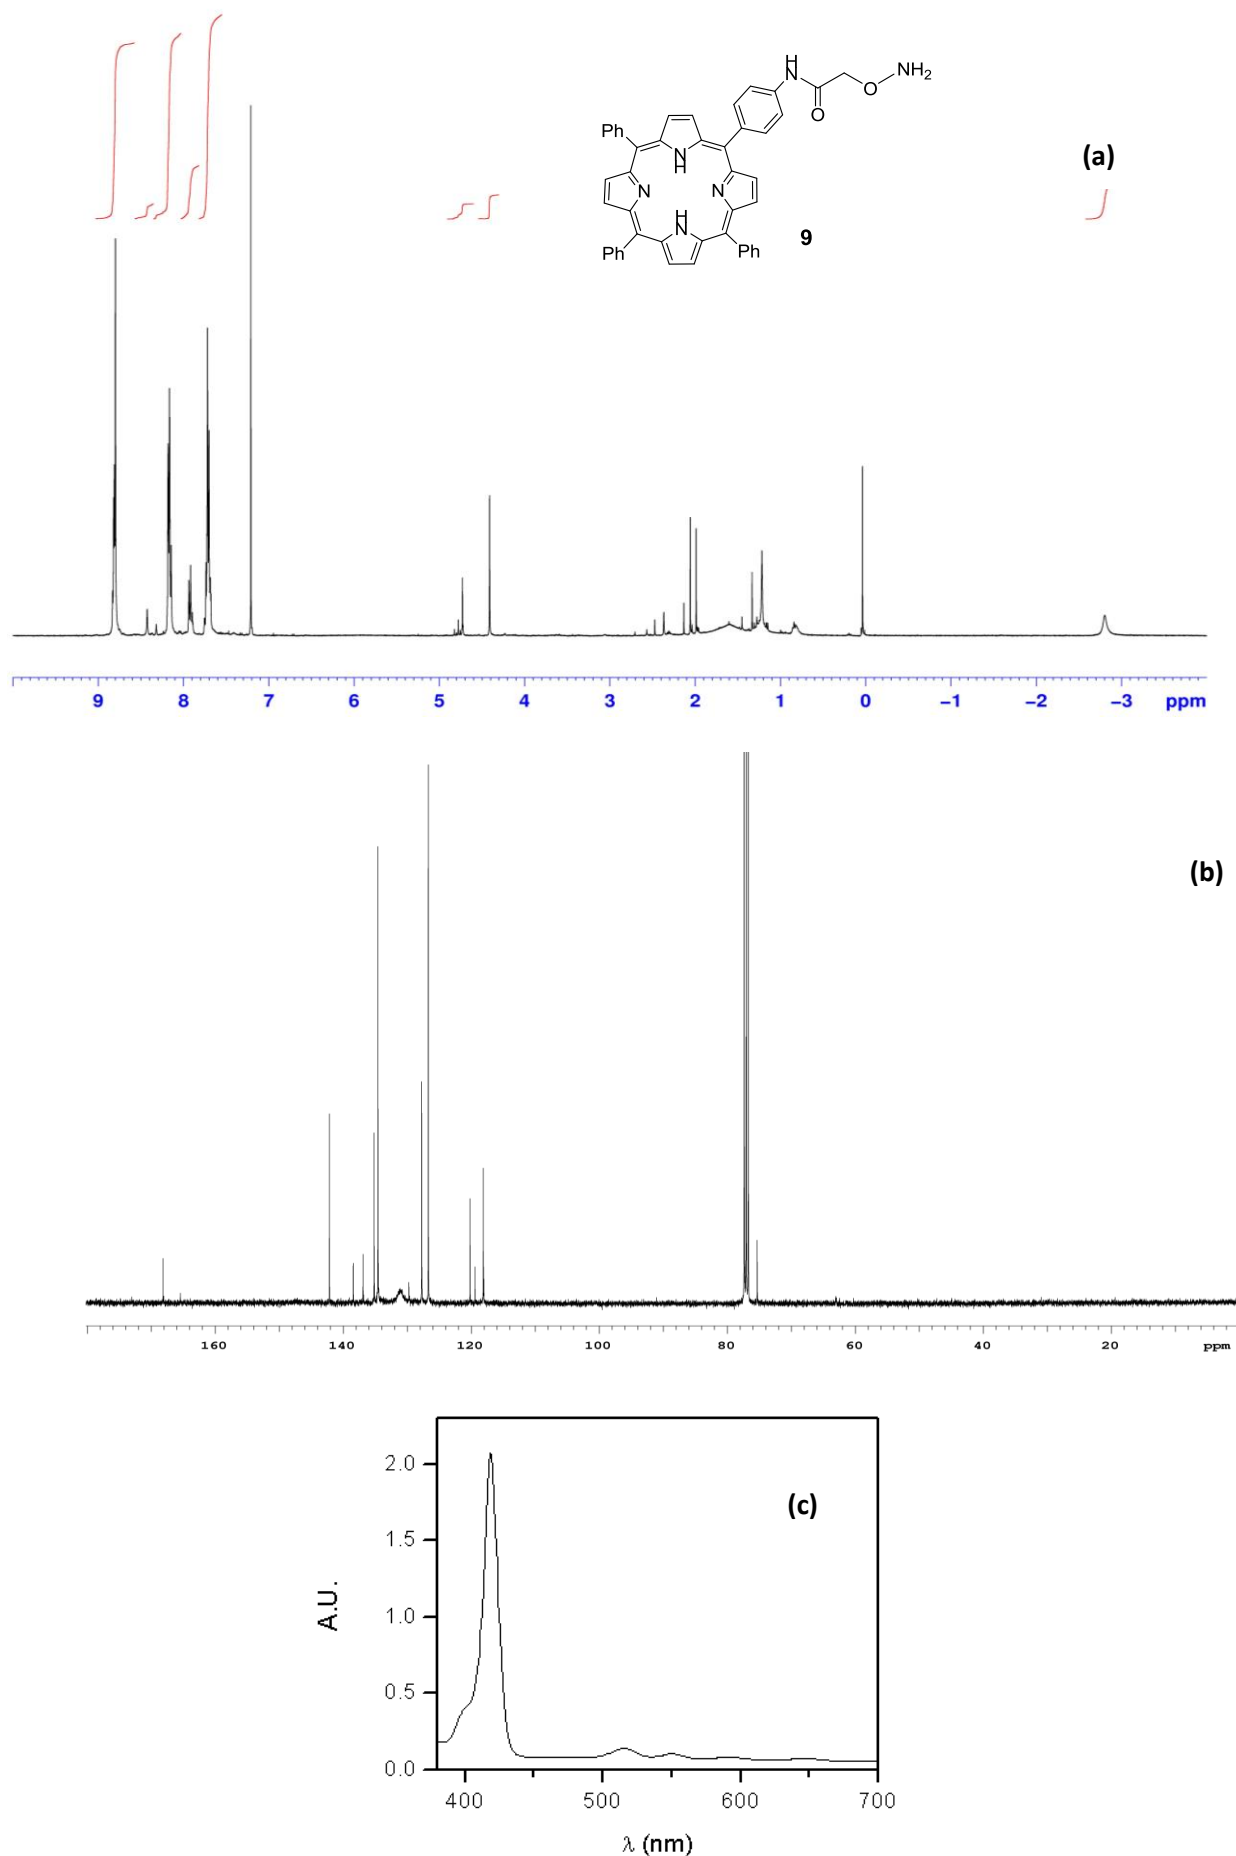

Figure 6 (a)-(b). <sup>1</sup>H NMR and <sup>13</sup>C NMR spectra in CDCl<sub>3</sub> of **9** (c) UV-visible spectrum in CHCl<sub>3</sub> of **9**.

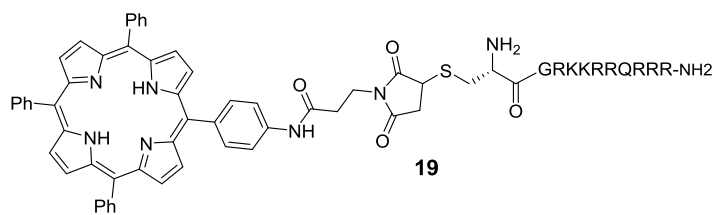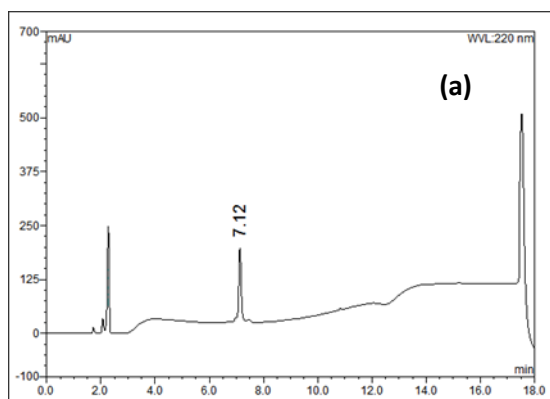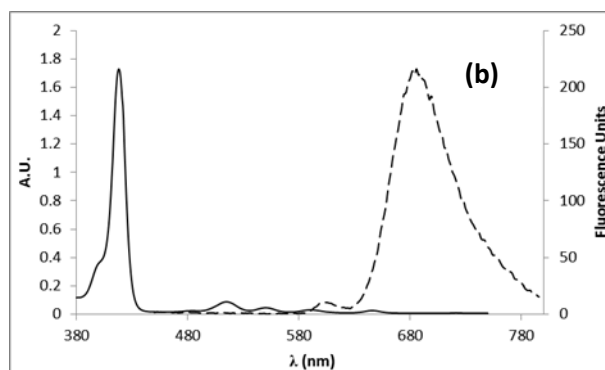

**Figure 7 (a)** HPLC profile of conjugate **19** (elution Method 2, see General Information); **(b)** UV-visible (solid line) and fluorescence (dotted line) spectra in 0.1% aq TFA of conjugate **19**.

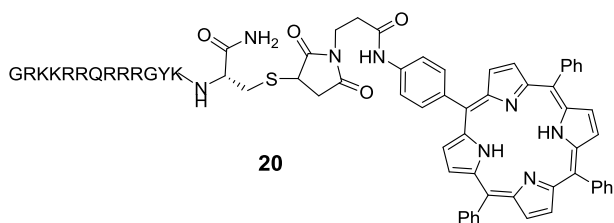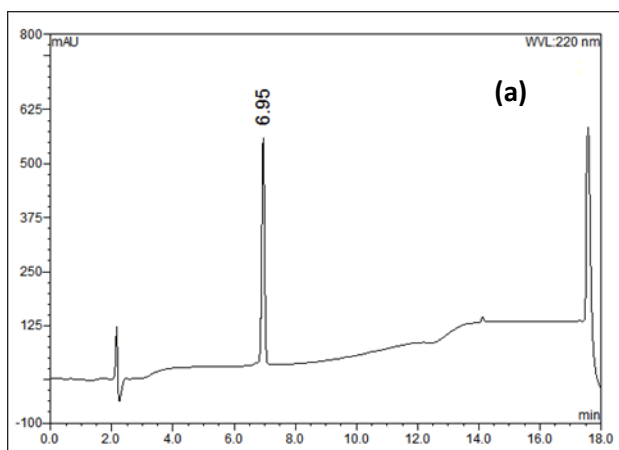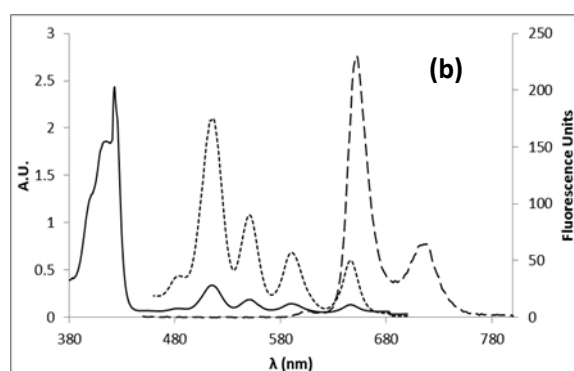

**Figure 8 (a)** HPLC profile of conjugate **20** (elution Method 2, see General Information); **(b)** UV-visible (solid line) and fluorescence (dotted line) spectra in 0.1% aq TFA of conjugate **20**.



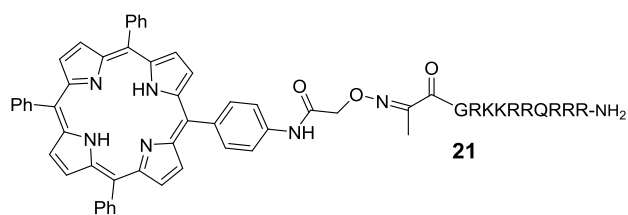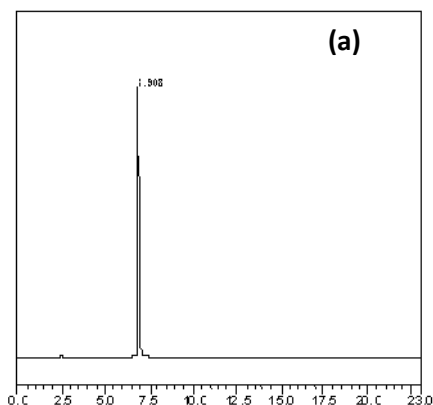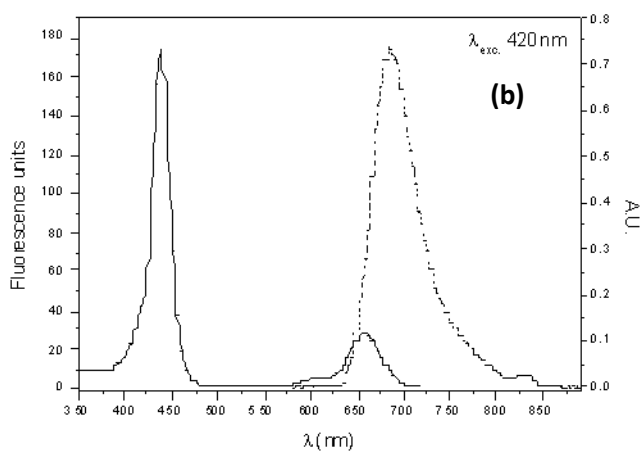

**Figure 9** (a) HPLC profile of conjugate **21** (elution Method 2, see General Information); (b) UV-visible (solid line) and fluorescence (dotted line) spectra in 0.1% aq TFA of conjugate **21**.

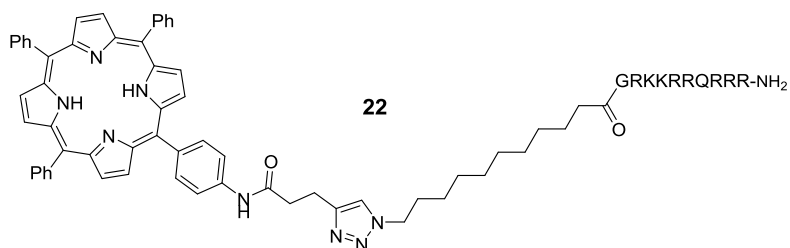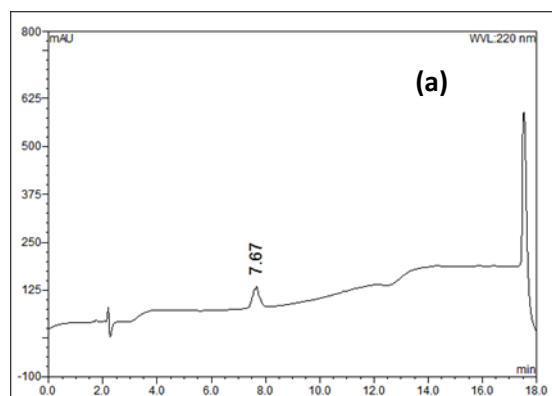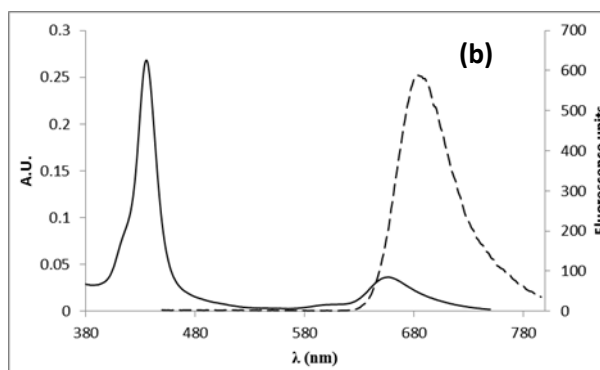

**Figure 10** (a) HPLC profile of conjugate **22** (elution Method 2, see General Information); (b) UV-visible (solid line) and fluorescence (dotted line) spectra in 0.1% aq TFA of conjugate **22**.

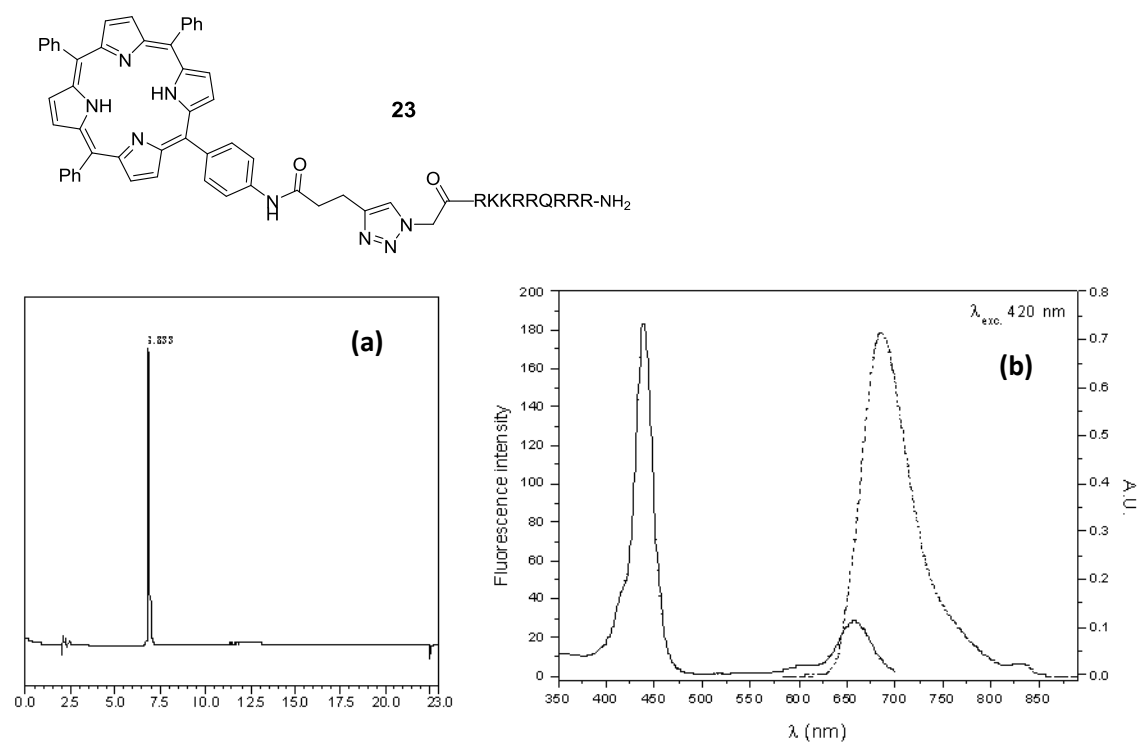

**Figure 11** (a) HPLC profile of conjugate **23** (elution Method 2, see General Information); (b) UV-visible (solid line) and fluorescence (dotted line) spectra in 0.1% aq TFA of conjugate **23**.

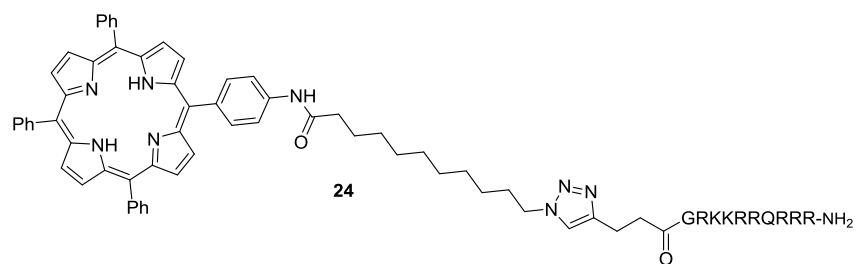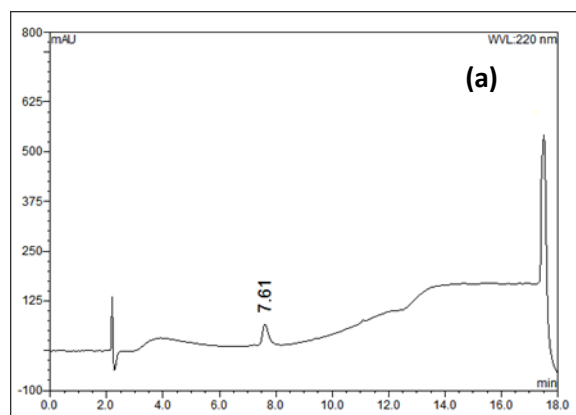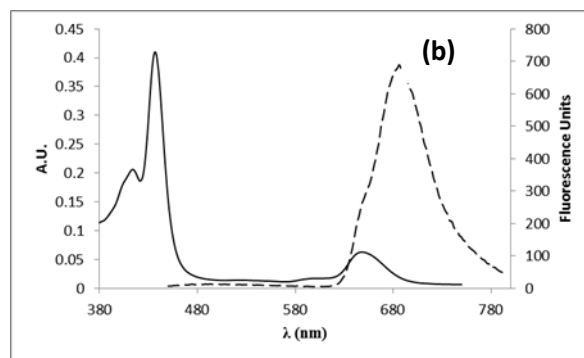

**Figure 12 (a)** HPLC profile of conjugate **24** (elution Method 2, see General Information); **(b)** UV-visible (solid line) and fluorescence (dotted line) spectra in 0.1% aq TFA of conjugate **24**.

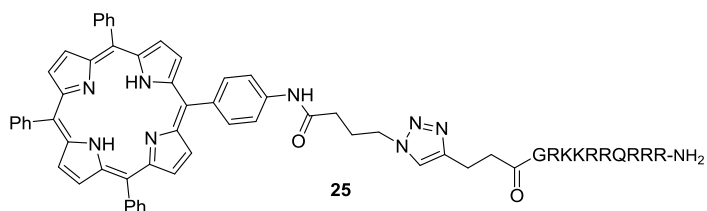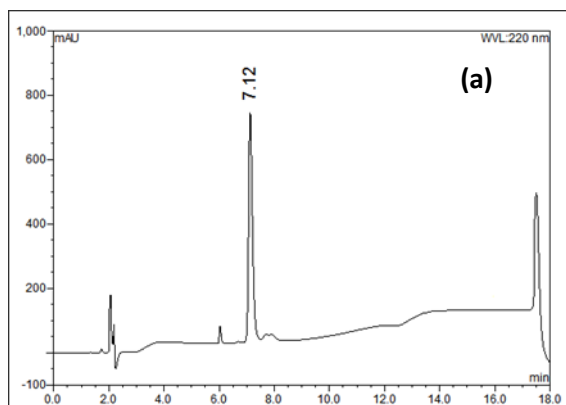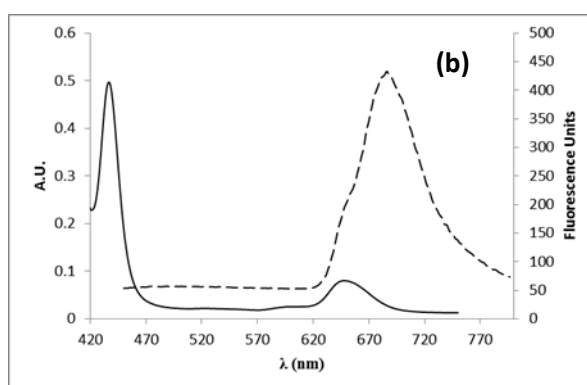

**Figure 13 (a)** HPLC profile of conjugate **25** (elution Method 2, see General Information); **(b)** UV-visible (solid line) and fluorescence (dotted line) spectra in 0.1% aq TFA of conjugate **25**.

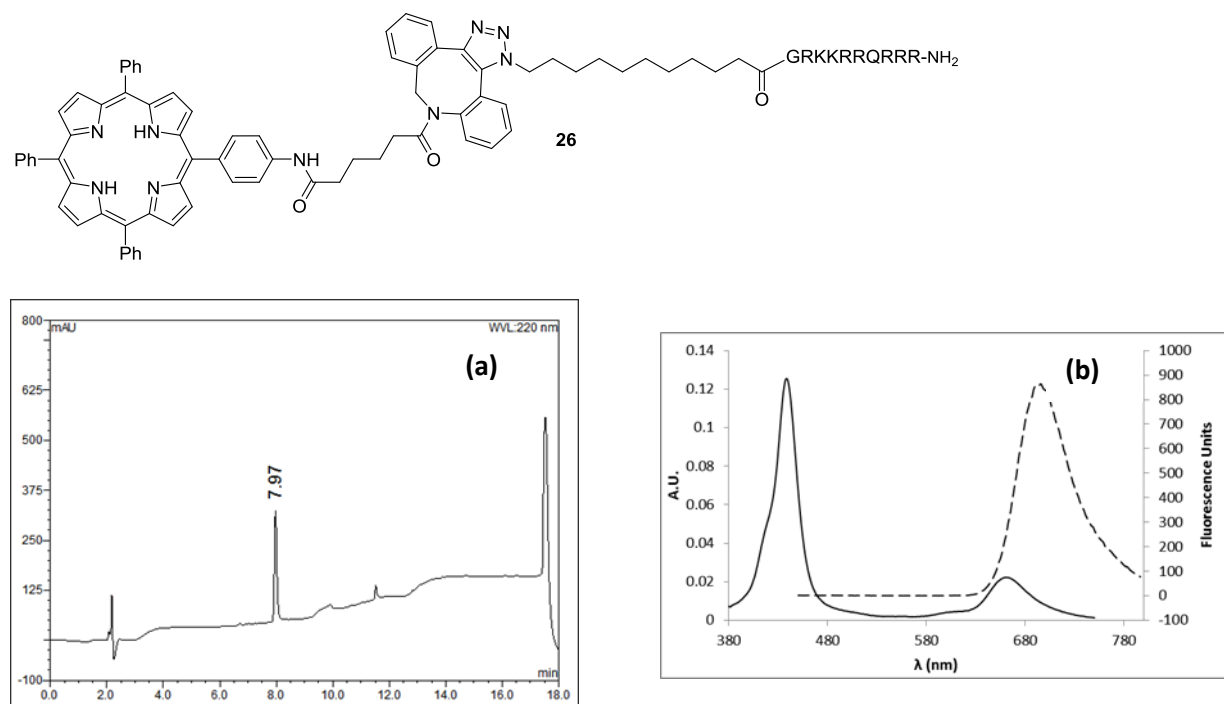

**Figure 14 (a)** HPLC profile of conjugate **26** (elution Method 2, see General Information); **(b)** UV-visible (solid line) and fluorescence (dotted line) spectra in 0.1% aq TFA of conjugate **26**.

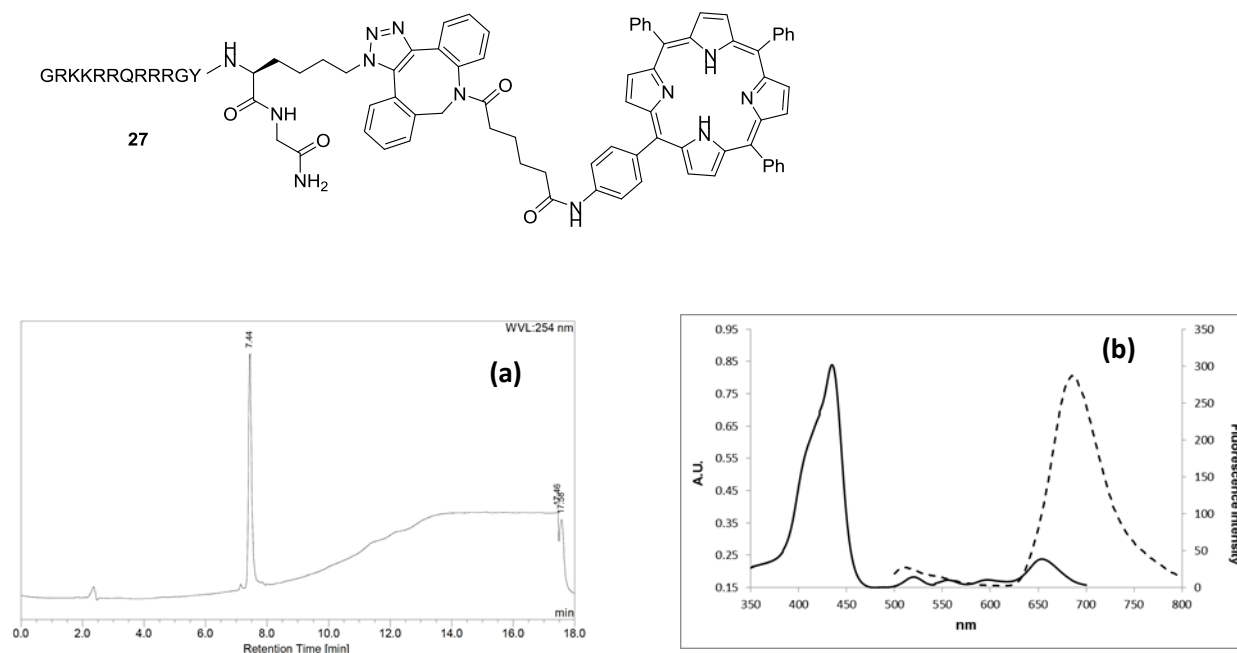

**Figure 15 (a)** HPLC profile of conjugate **27** (elution Method 2, see General Information); **(b)** UV-visible (solid line) and fluorescence (dotted line) spectra in 0.1% aq TFA of conjugate **27**.

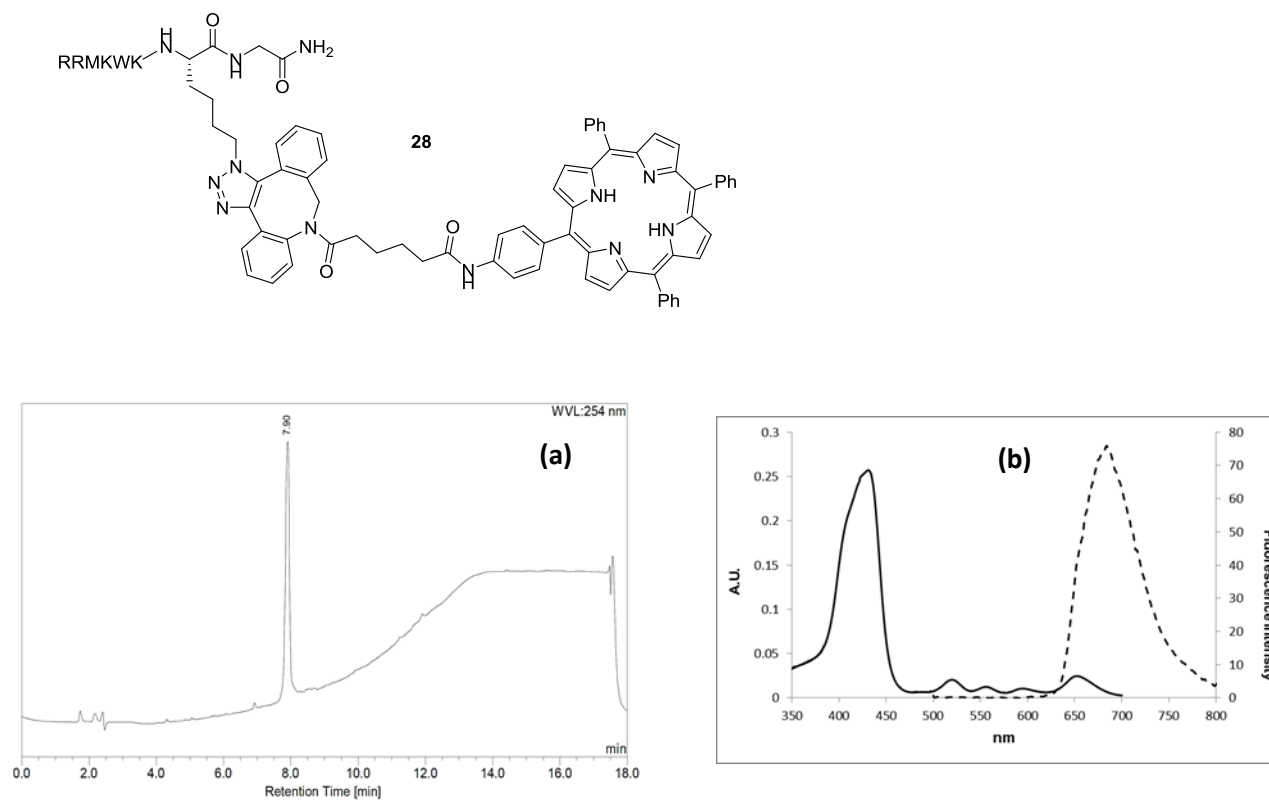

**Figure 16 (a)** HPLC profile of conjugate **28** (elution Method 2, see General Information); **(b)** UV-visible (solid line) and fluorescence (dotted line) spectra in 0.1% aq TFA of conjugate **28**.

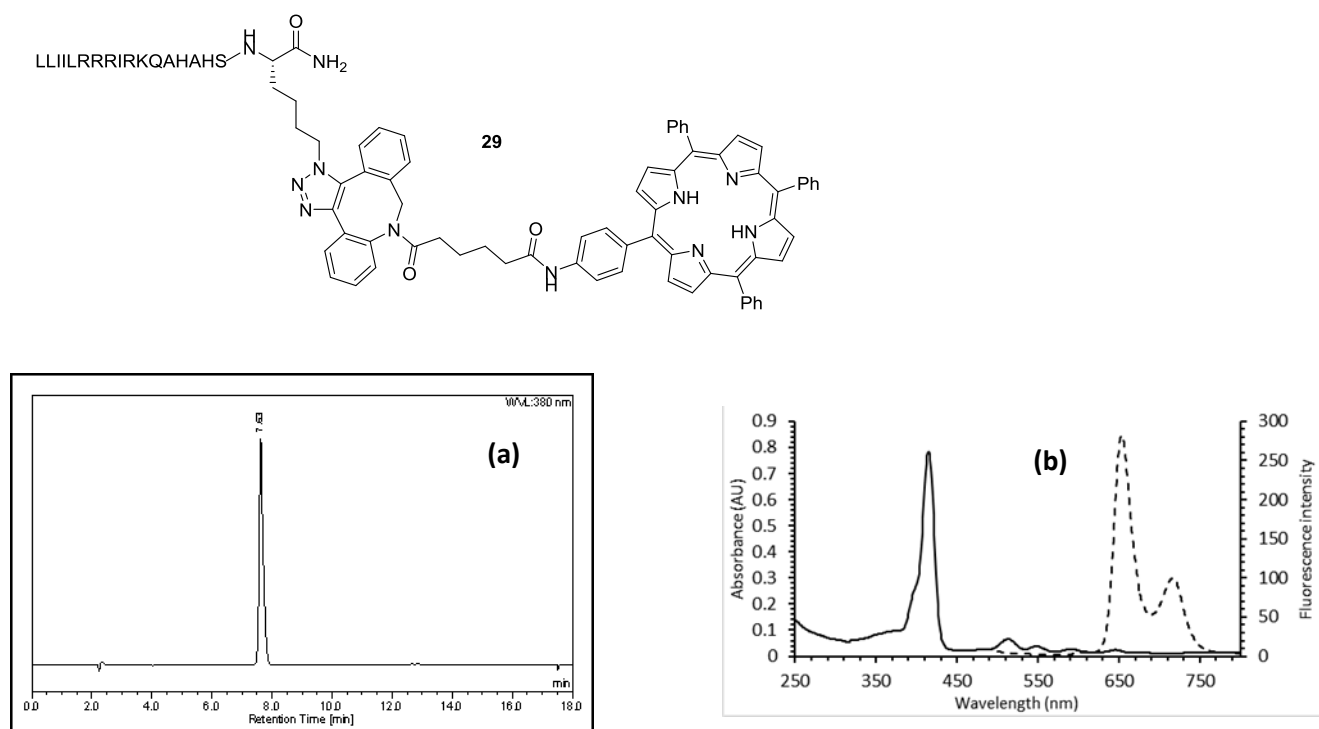

**Figure 17 (a)** HPLC profile of conjugate **29** (elution Method 2, see General Information); **(b)** UV-visible (solid line) and fluorescence (dotted line) spectra in 0.1% aq TFA of conjugate **29**.
